# Supplementary material for: Unusual binding mode of the biimidazolate bridging ligand in two novel heteropolynuclear complexes with an M2Ag2 [M = Ru(ii) or Os(ii)] core
Source: Royal Society of Chemistry journal article supplement (doi:10.1039/b100171j), 2001-01-01
Supplement: b100171jf.doc [file b100171jf.doc]

**Figure S1.** Positive ion ESI mass spectrum of{Ru(pap)2(Biim)}2Ag2](ClO4)2. H2O.


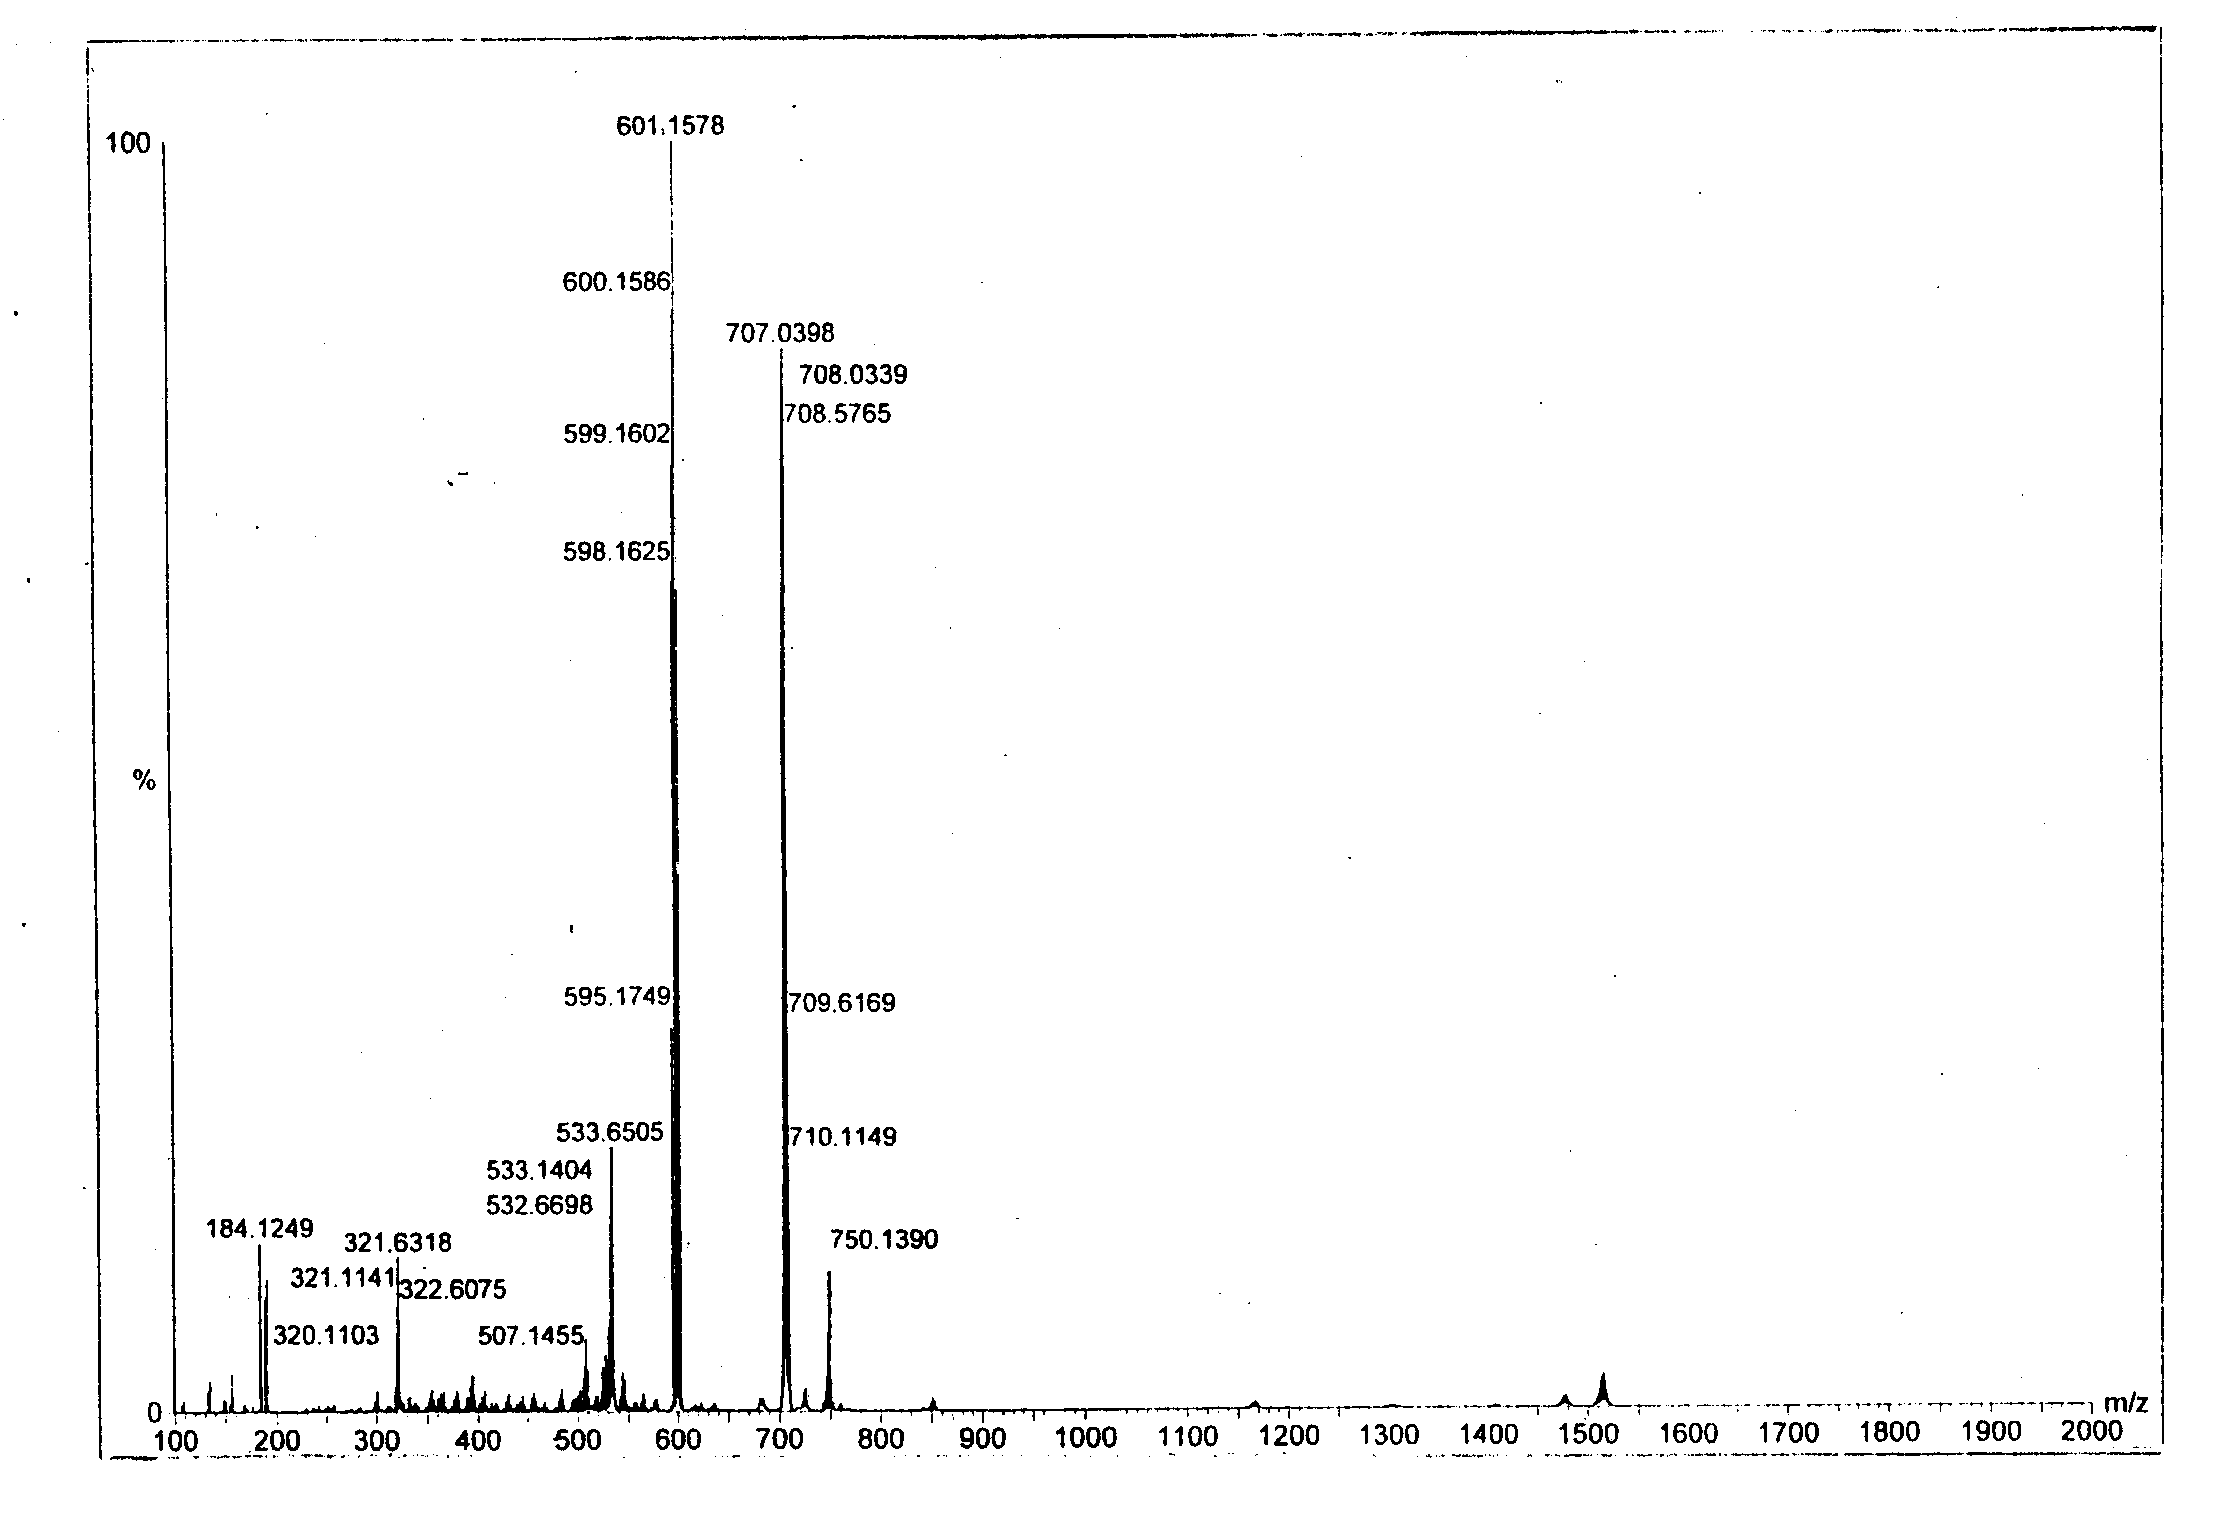


FIGURE S1

**Figure S2. (a)** Calculated and **(b)** observed mass spectral pattern of the fragment [[{Ru(pap)2(Biim)}2Ag2]ClO4]+ .


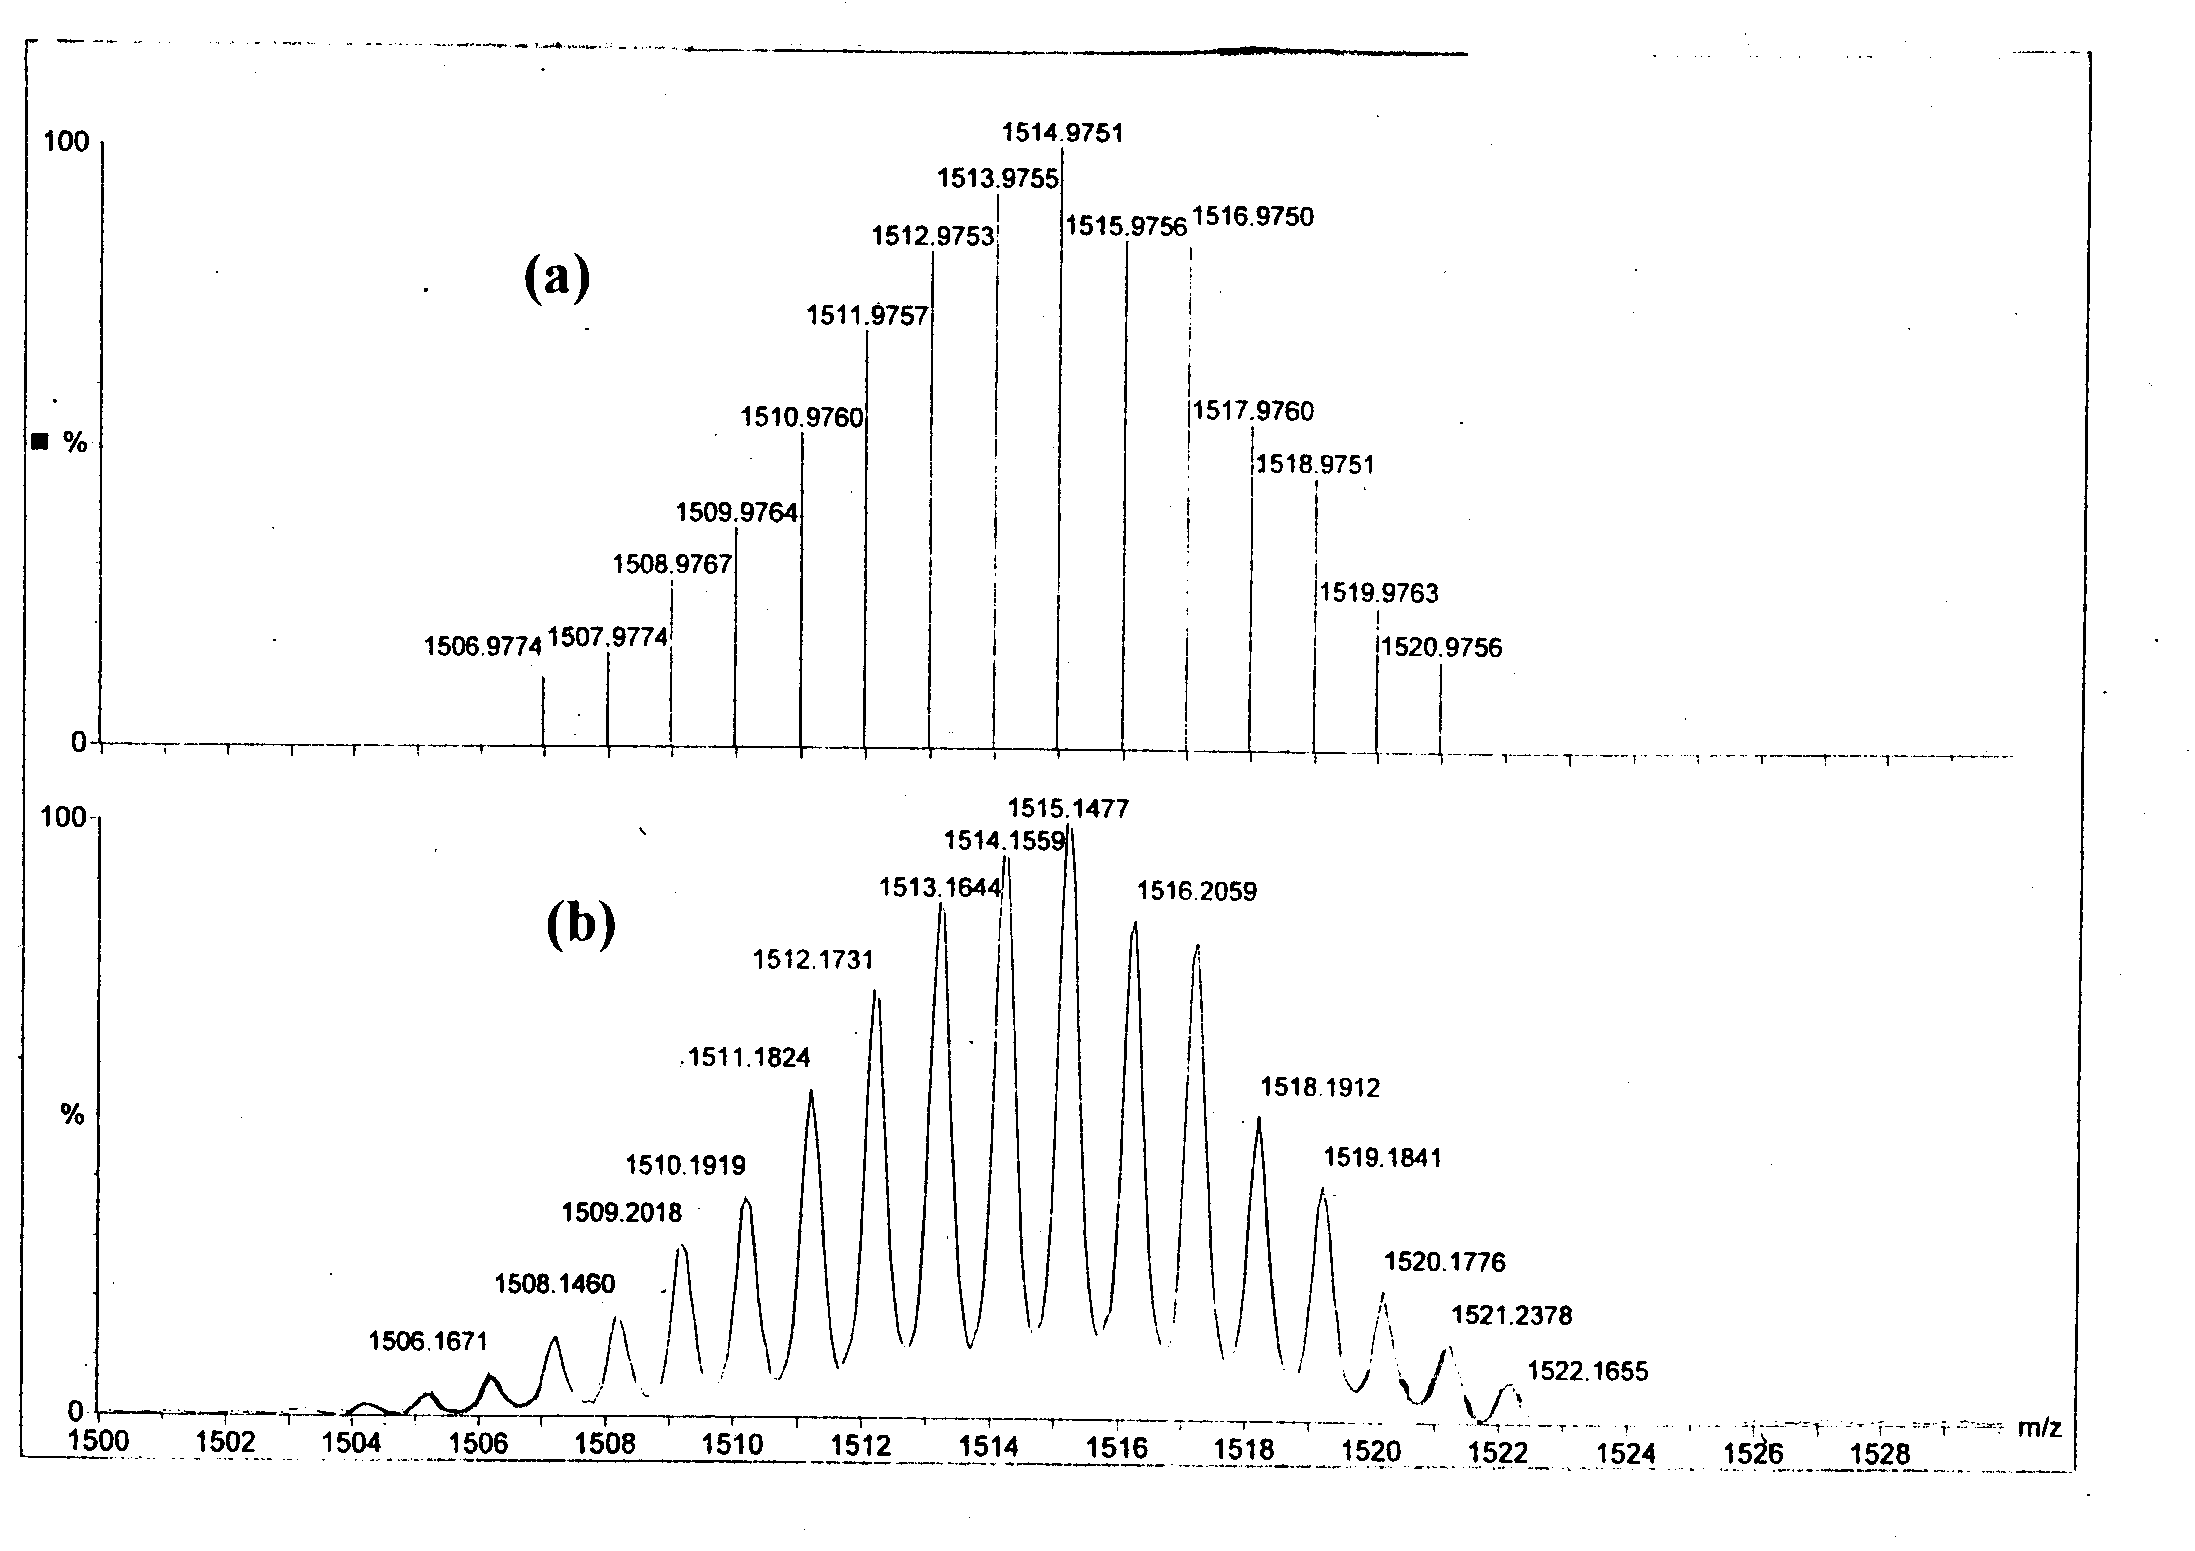


FIGURE S2

**Figure S3. (a)** Calculated and **(b)** observed mass spectral pattern of the fragment [{Ru(pap)2(Biim)}2Ag2]2+ .


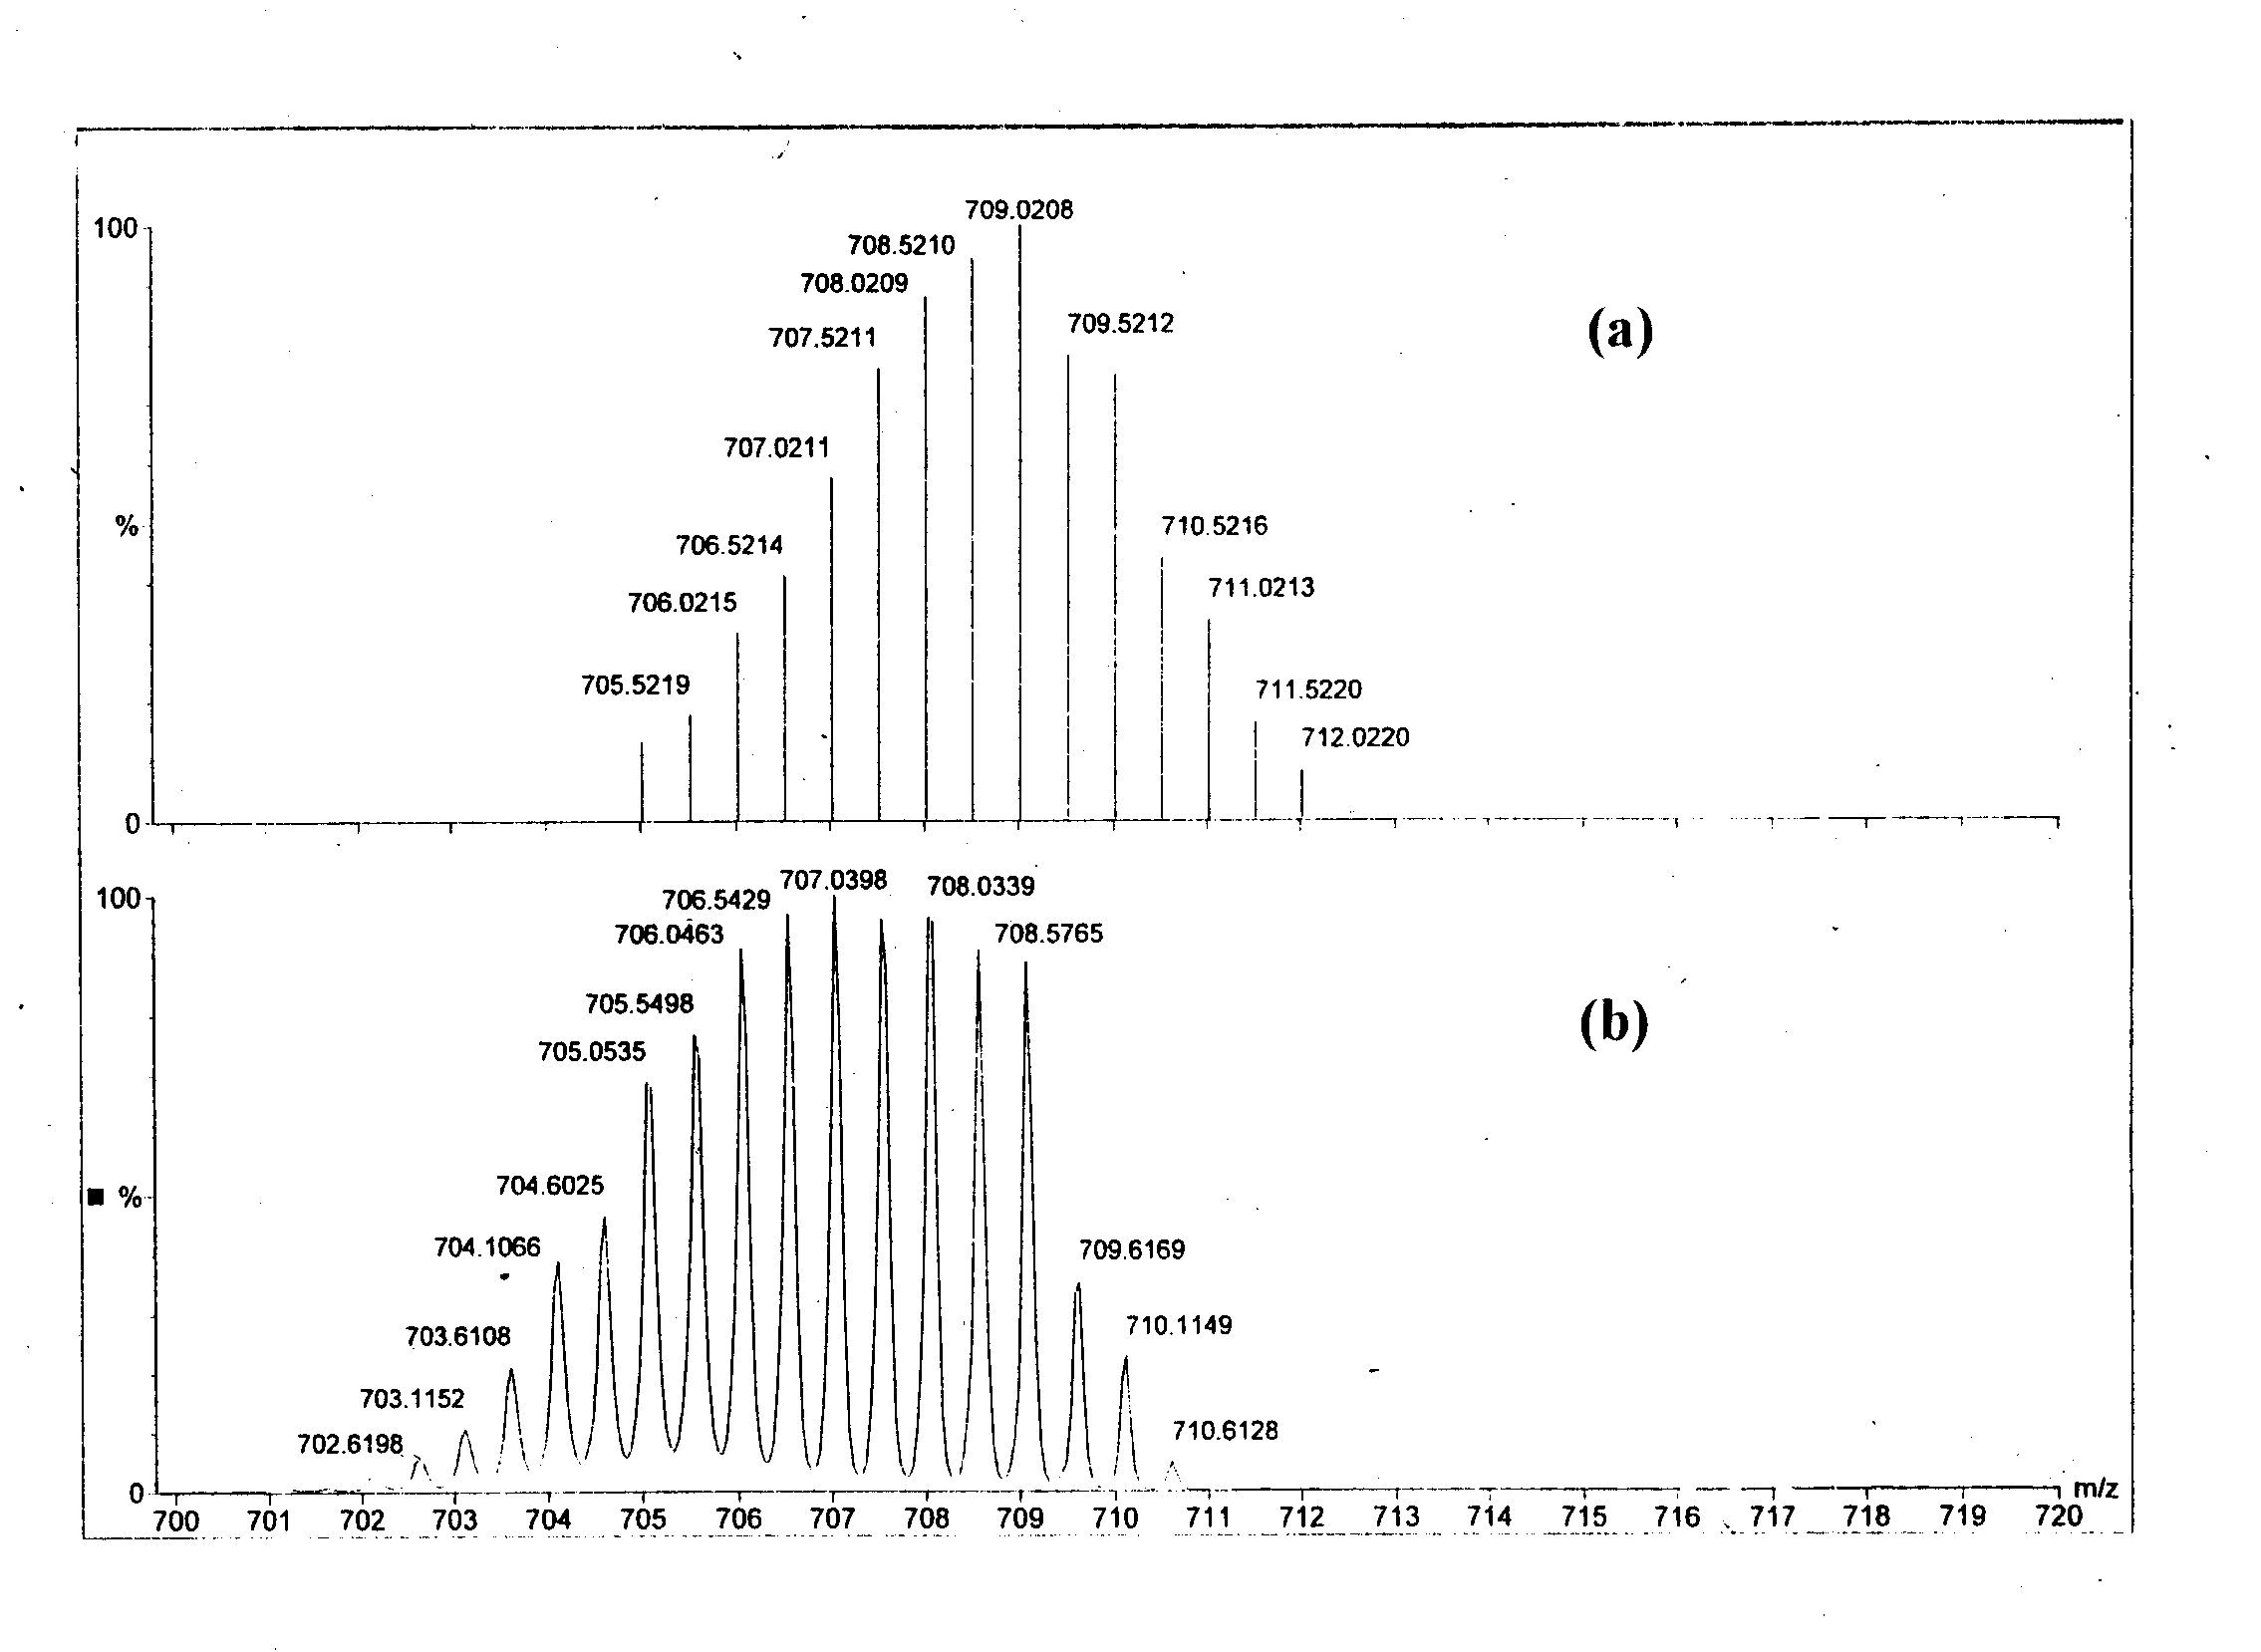


FIGURE S3

**Figure S4. (a)** Calculated and **(b)**  observed mass spectral pattern of the fragment [Ru(pap)2(BiimH)]+ .


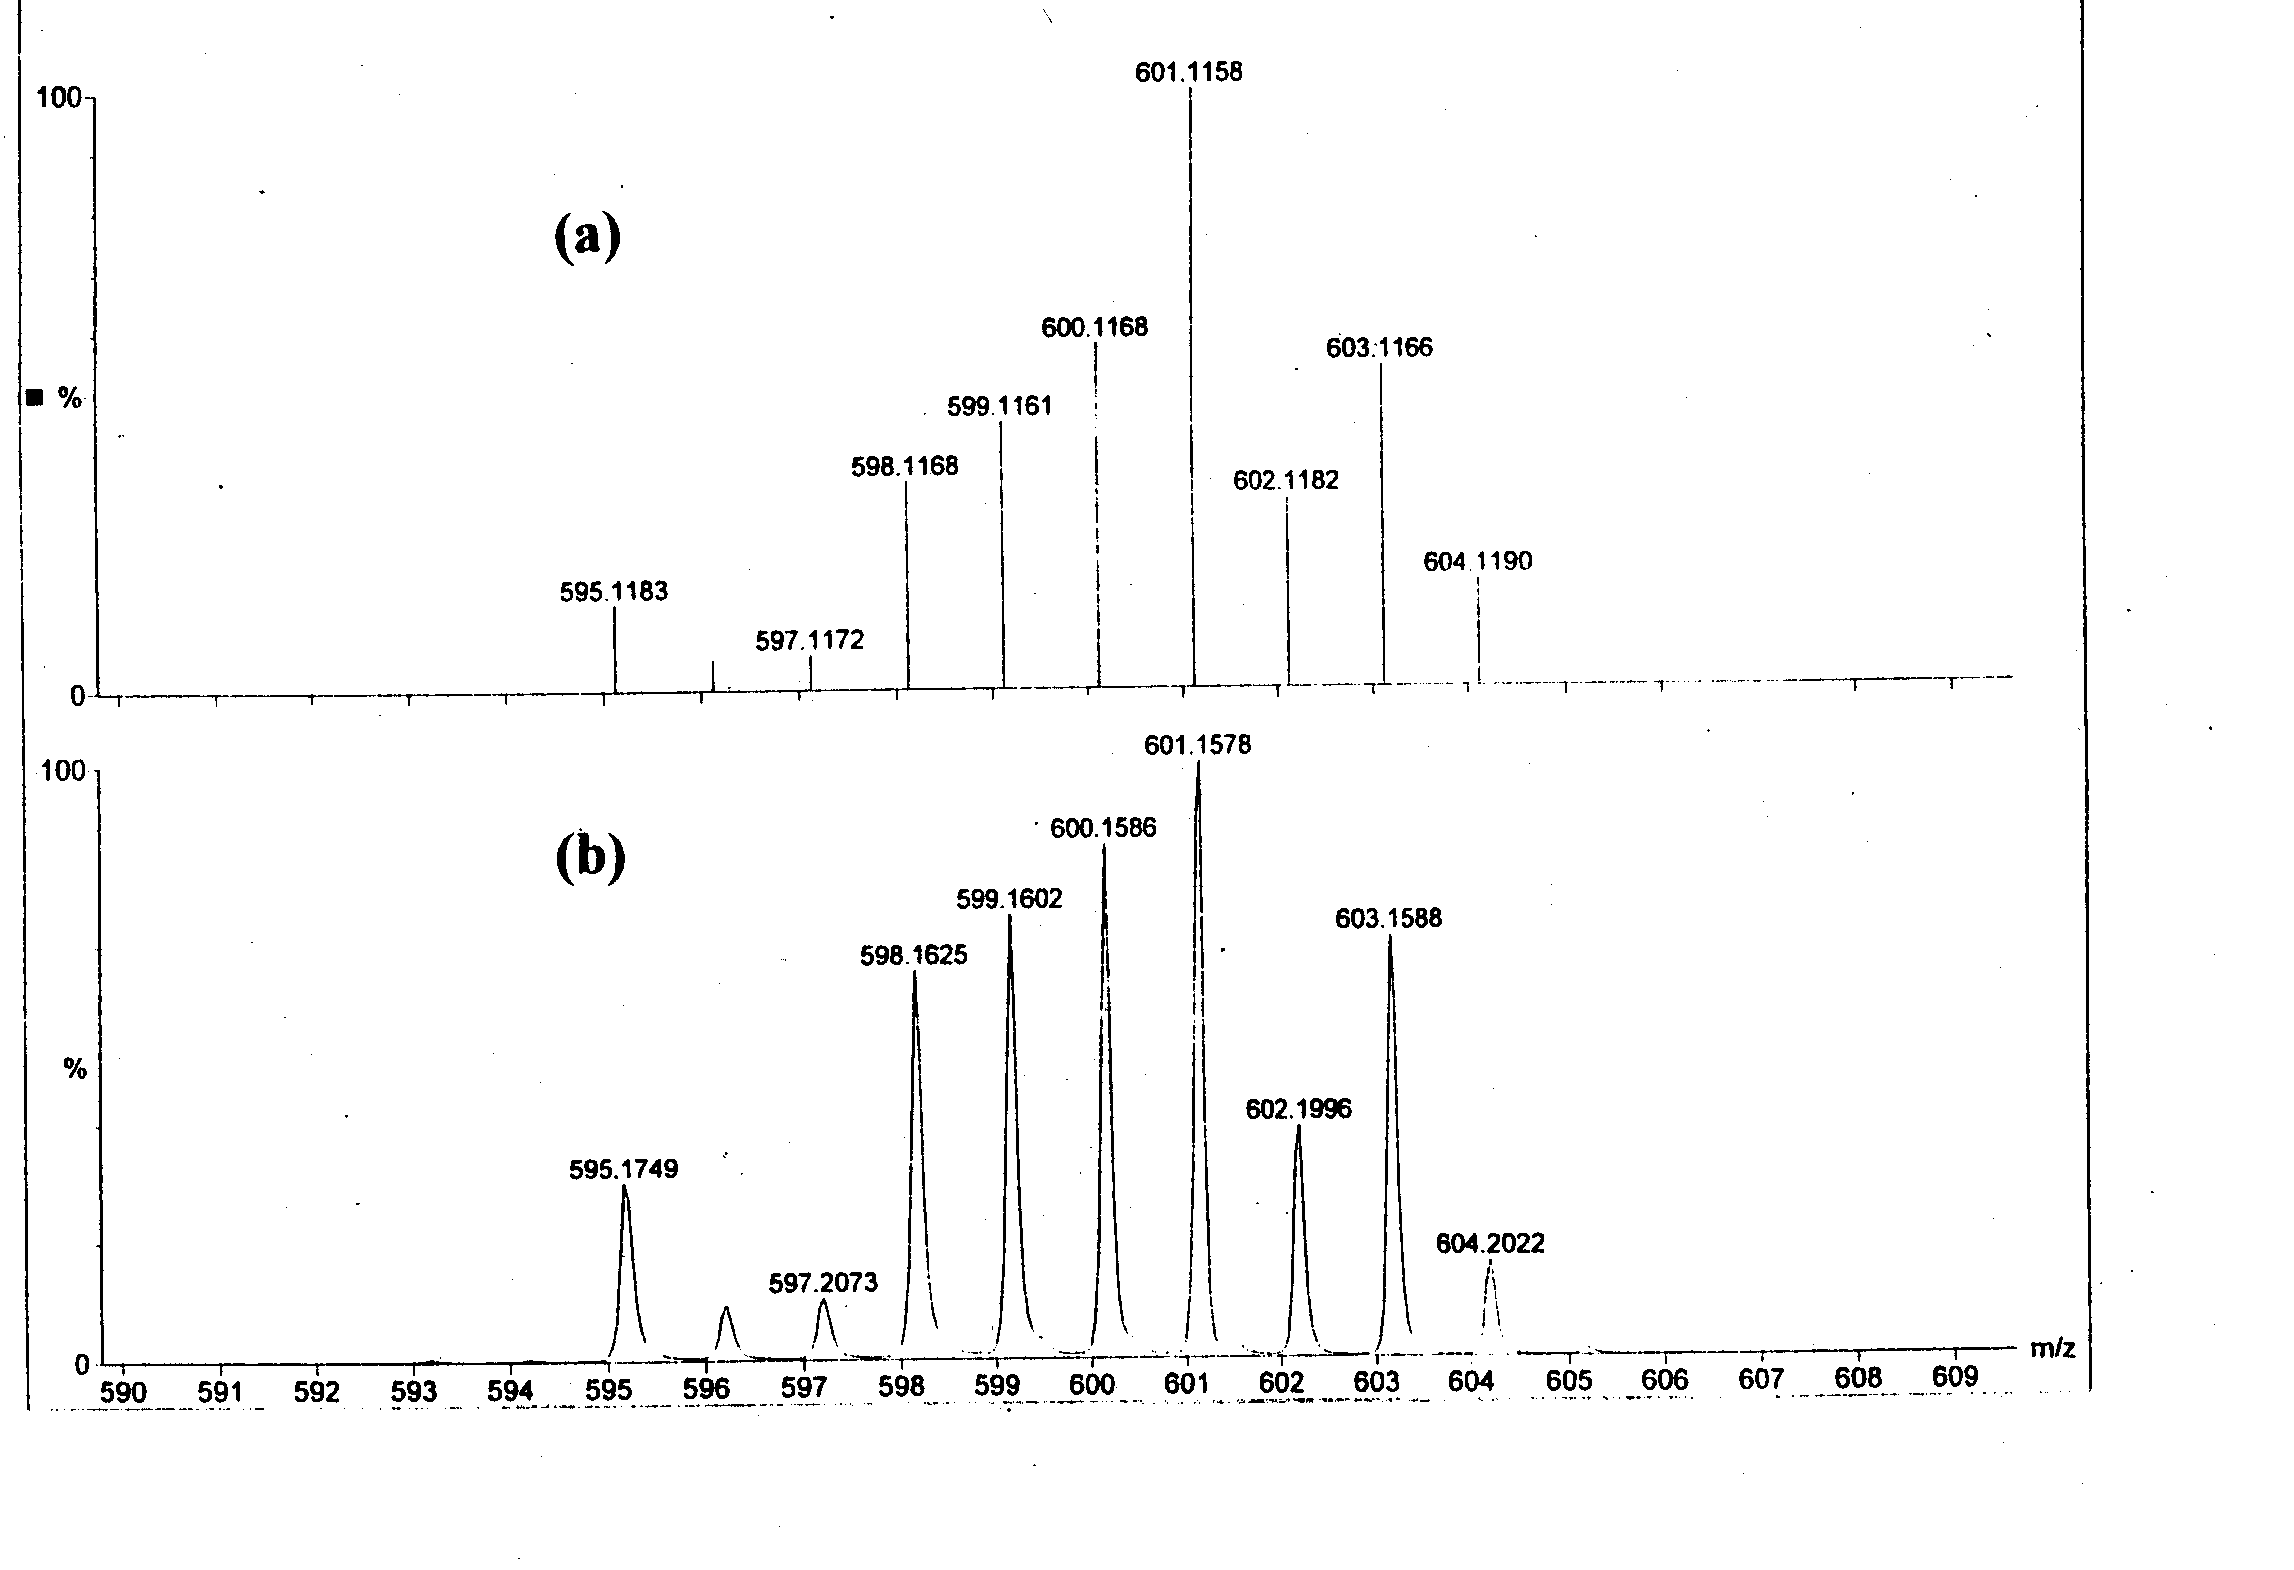


FIGURE S4
